# Supplementary material
Source: PubMed Central journal article supplement (PMC2271144)
Supplement: NIHMS38573-supplement-02.pdf [file NIHMS38573-supplement-02.pdf]

## Left Hand Response

## Right Hand Response

Tonal

Phonetic

Tonal

Phonetic

Depressed Control  
(n = 8)

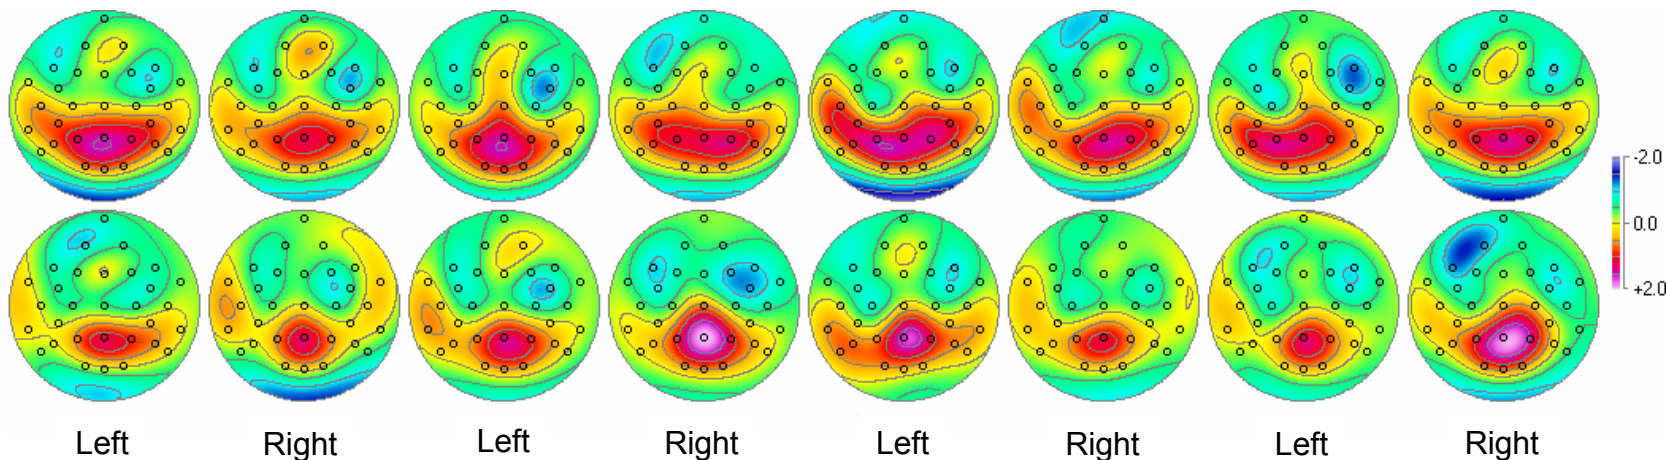

*Target Ear*
