# Supplementary material
Source: PubMed Central journal article supplement (PMC2271144)

# Target Ear

# Response Hand

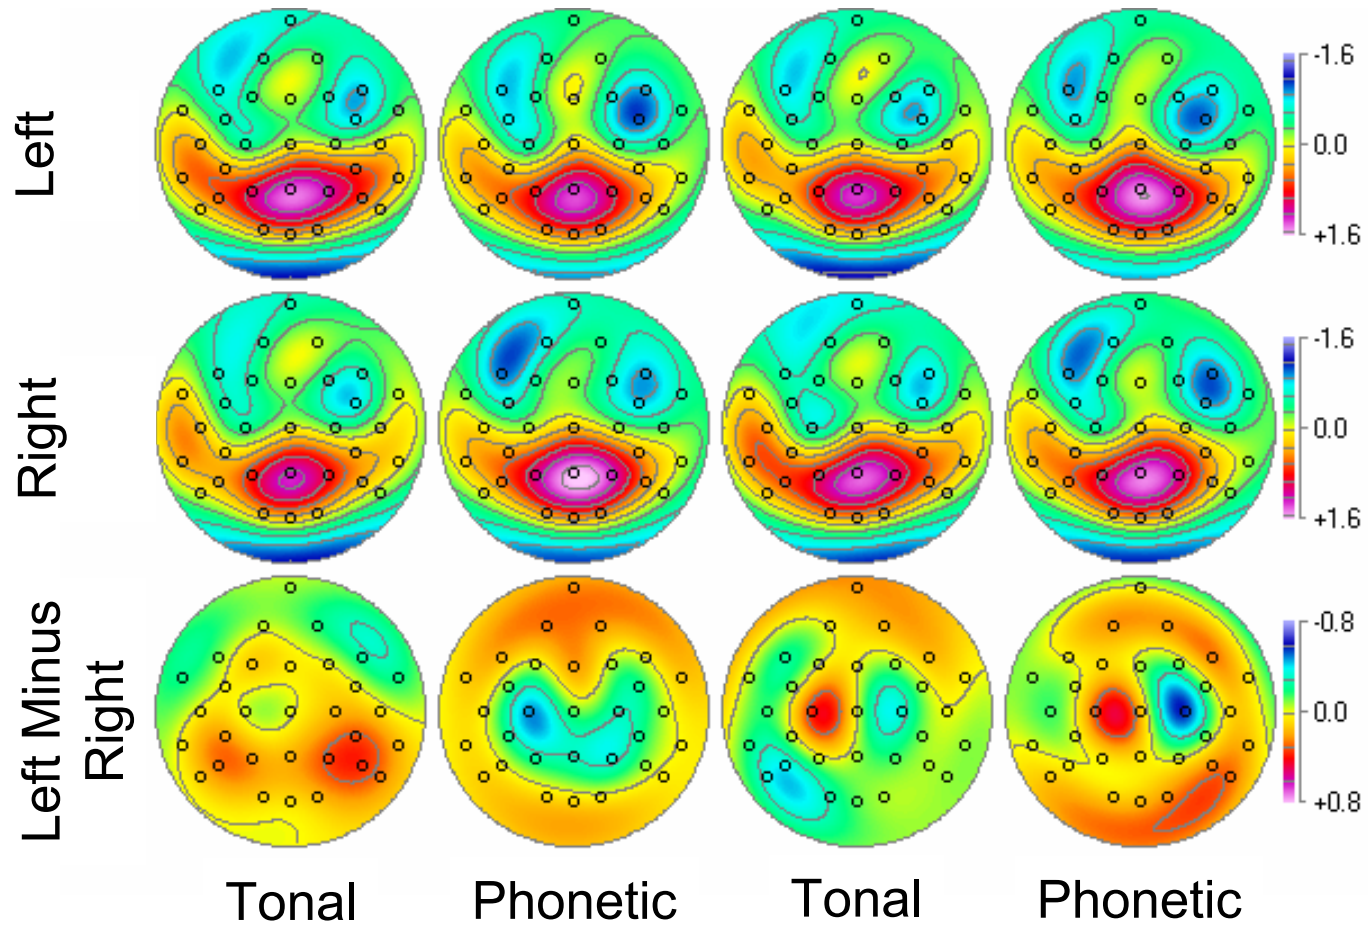

Supplement: NIHMS38573-supplement-01.pdf [file NIHMS38573-supplement-01.pdf]

# TONAL CSD

— Control  
- - - Patient

## Target

## Nontarget

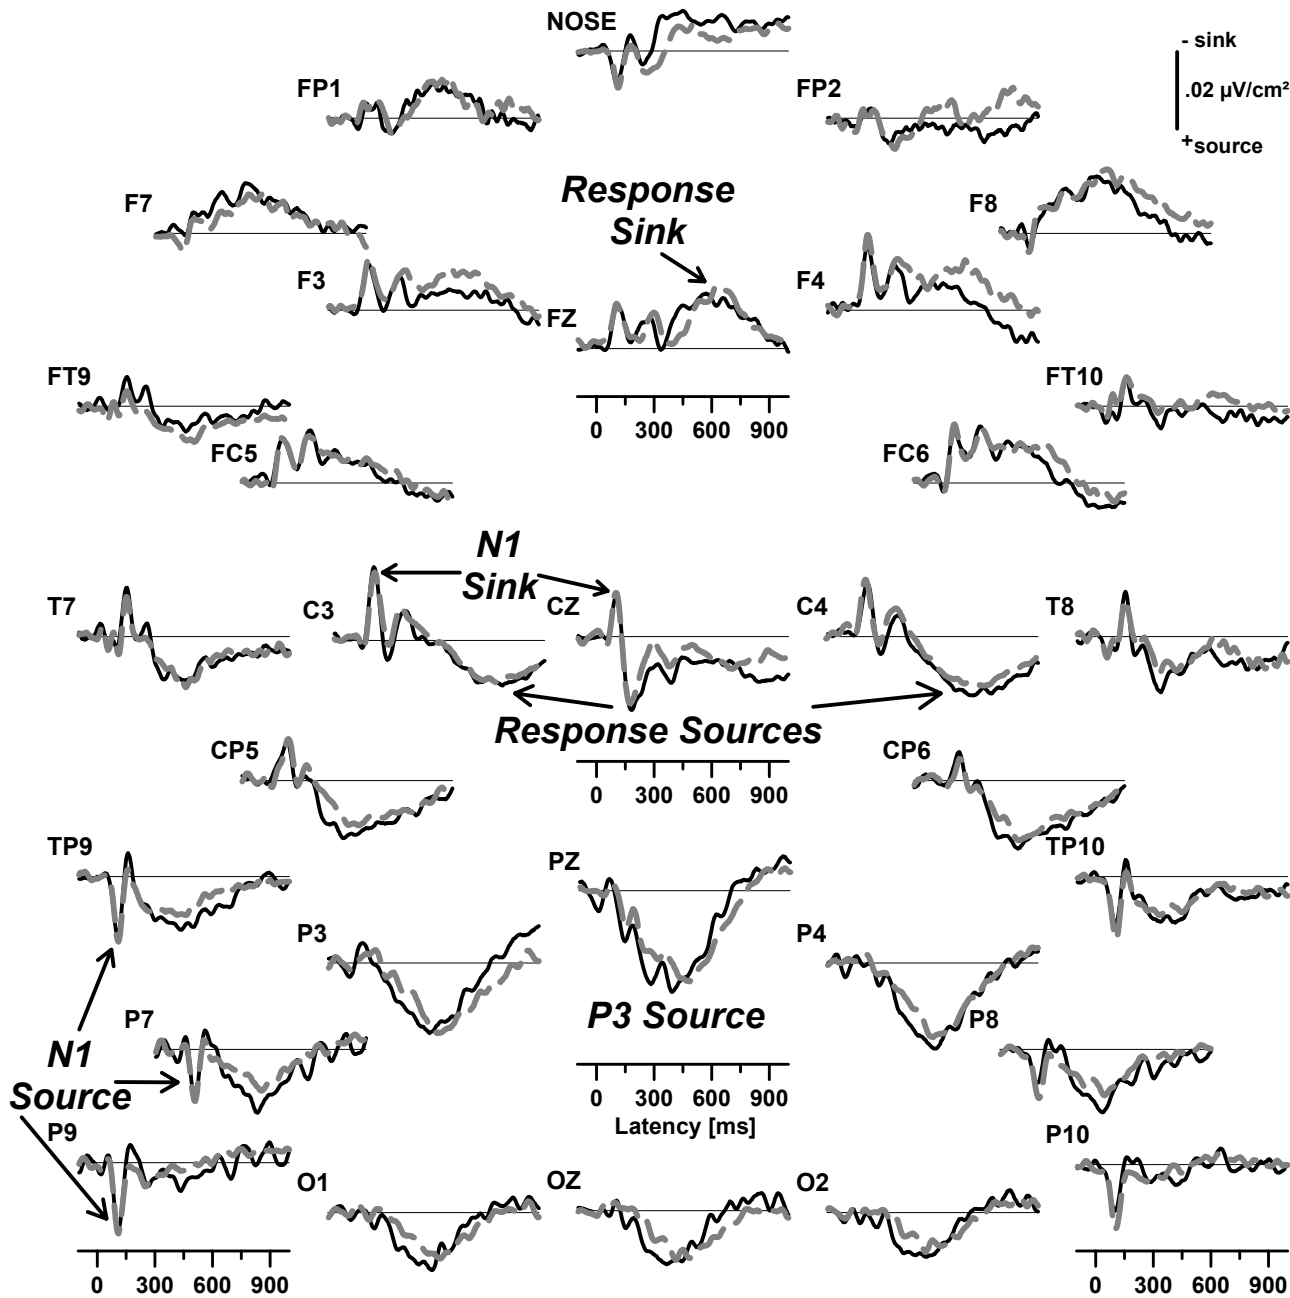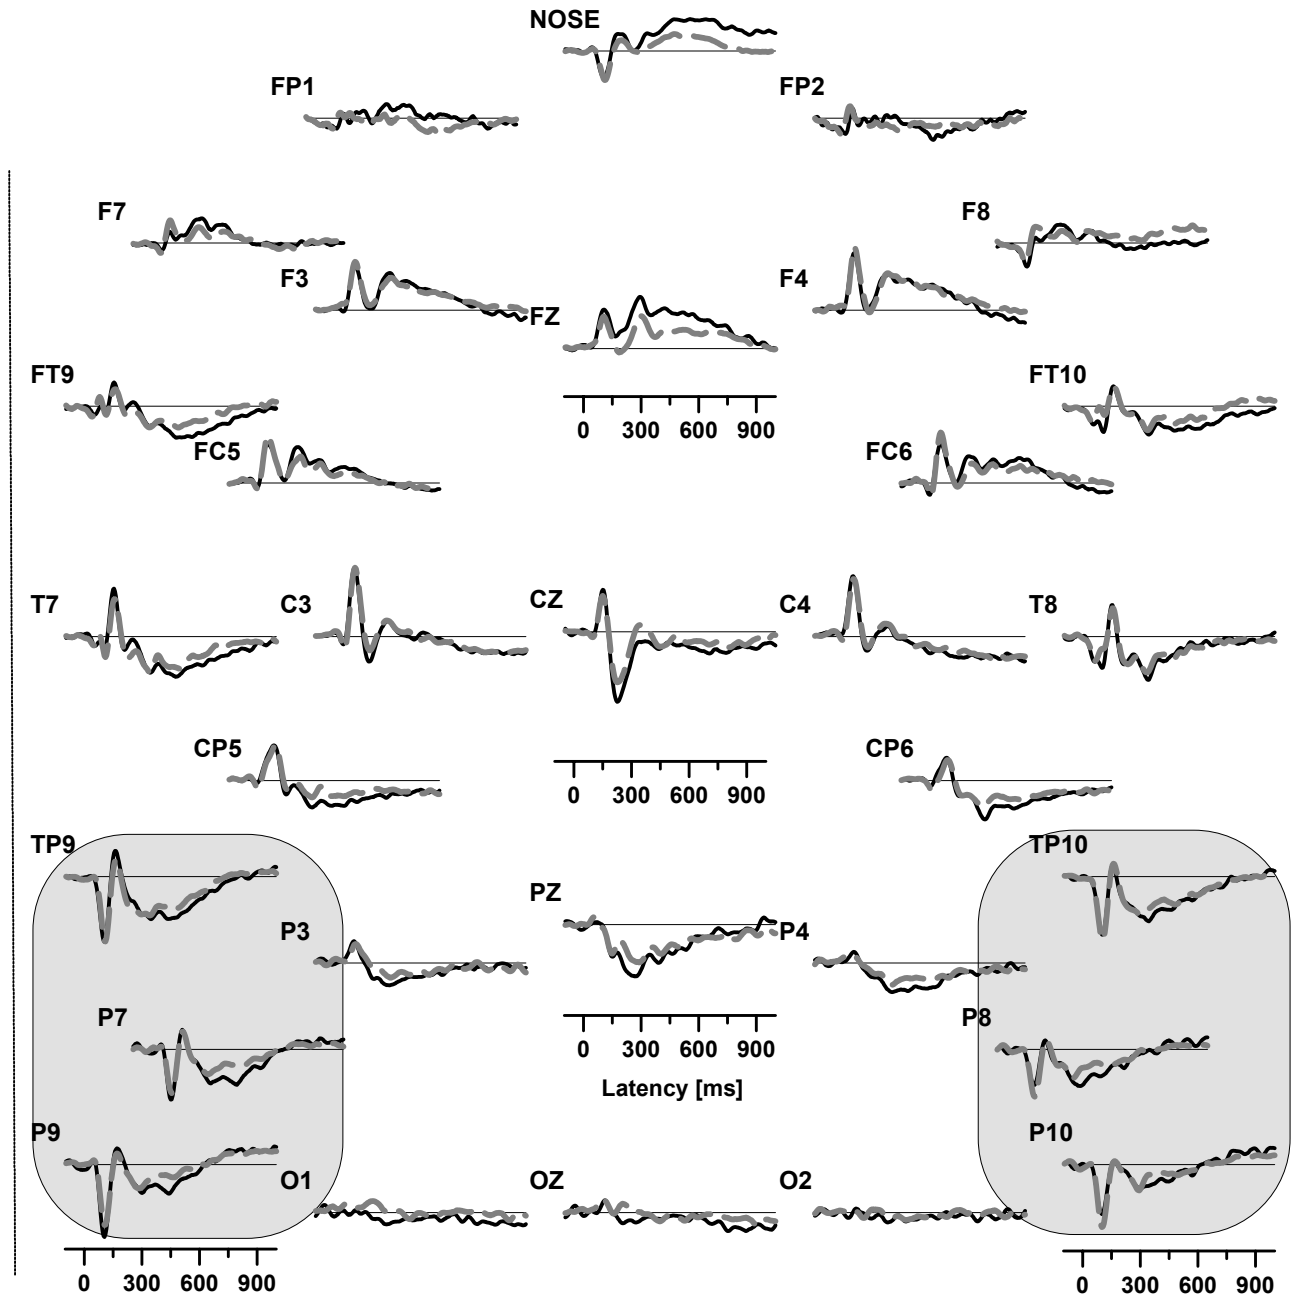

Supplement: NIHMS38573-supplement-03.pdf [file NIHMS38573-supplement-03.pdf]

# PHONETIC CSD

— Control

- - - Patient

## Target

## Nontarget

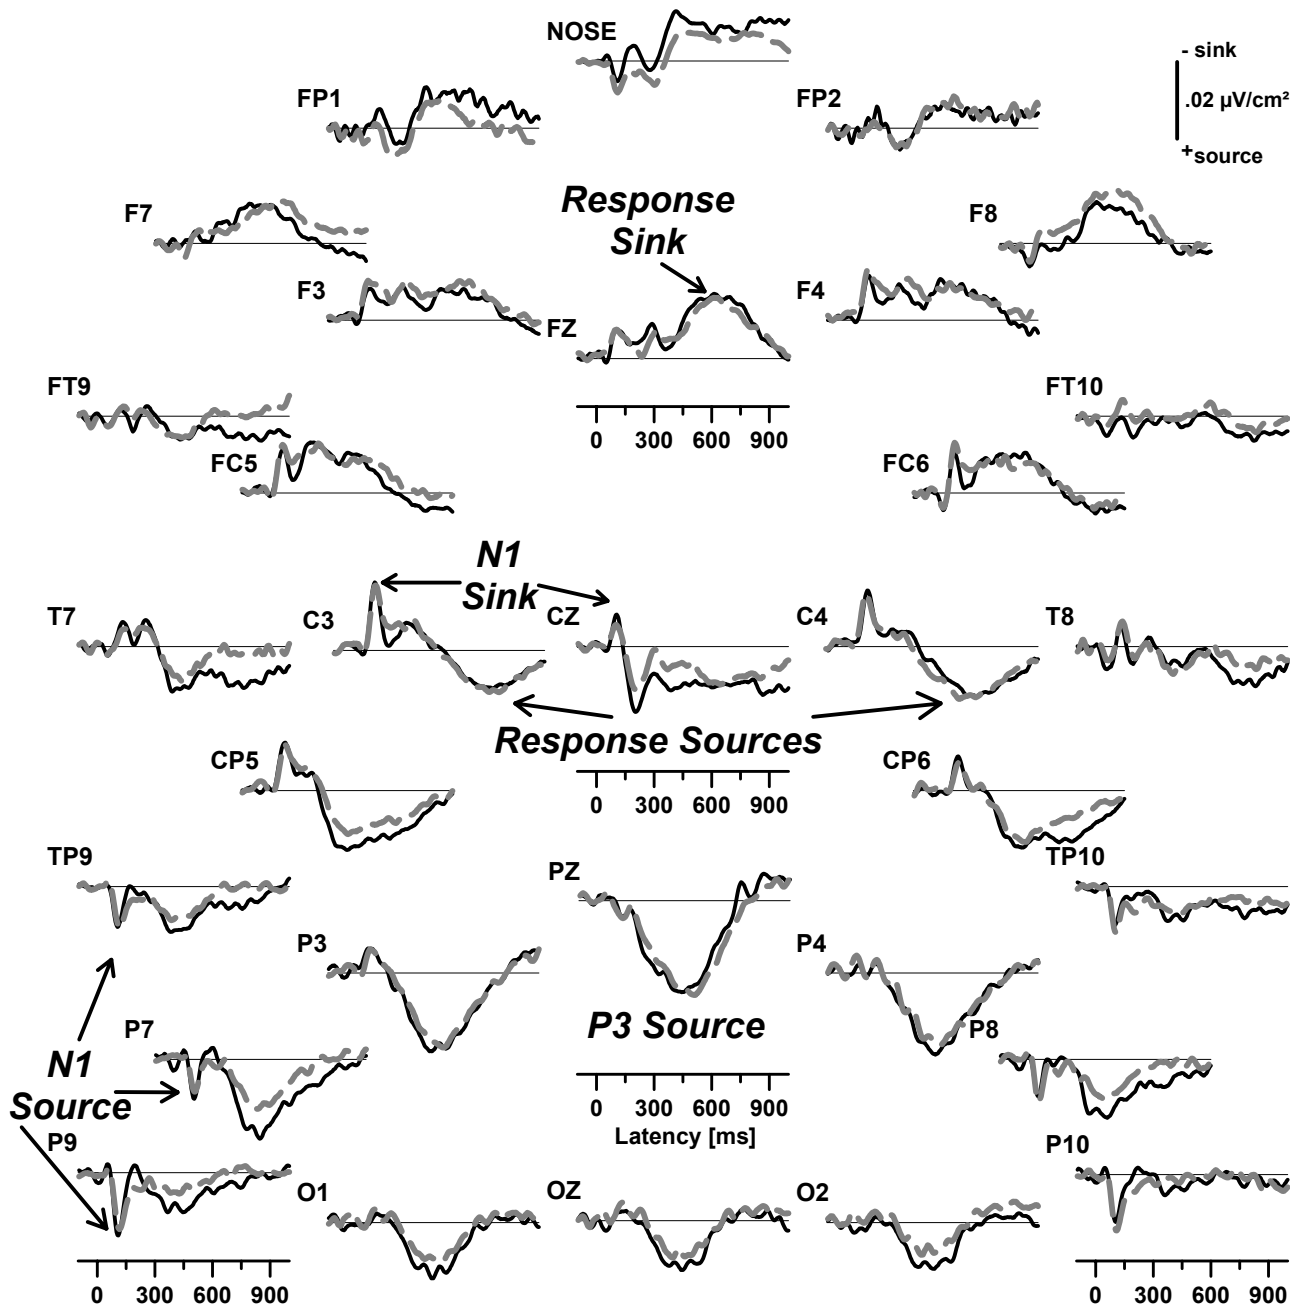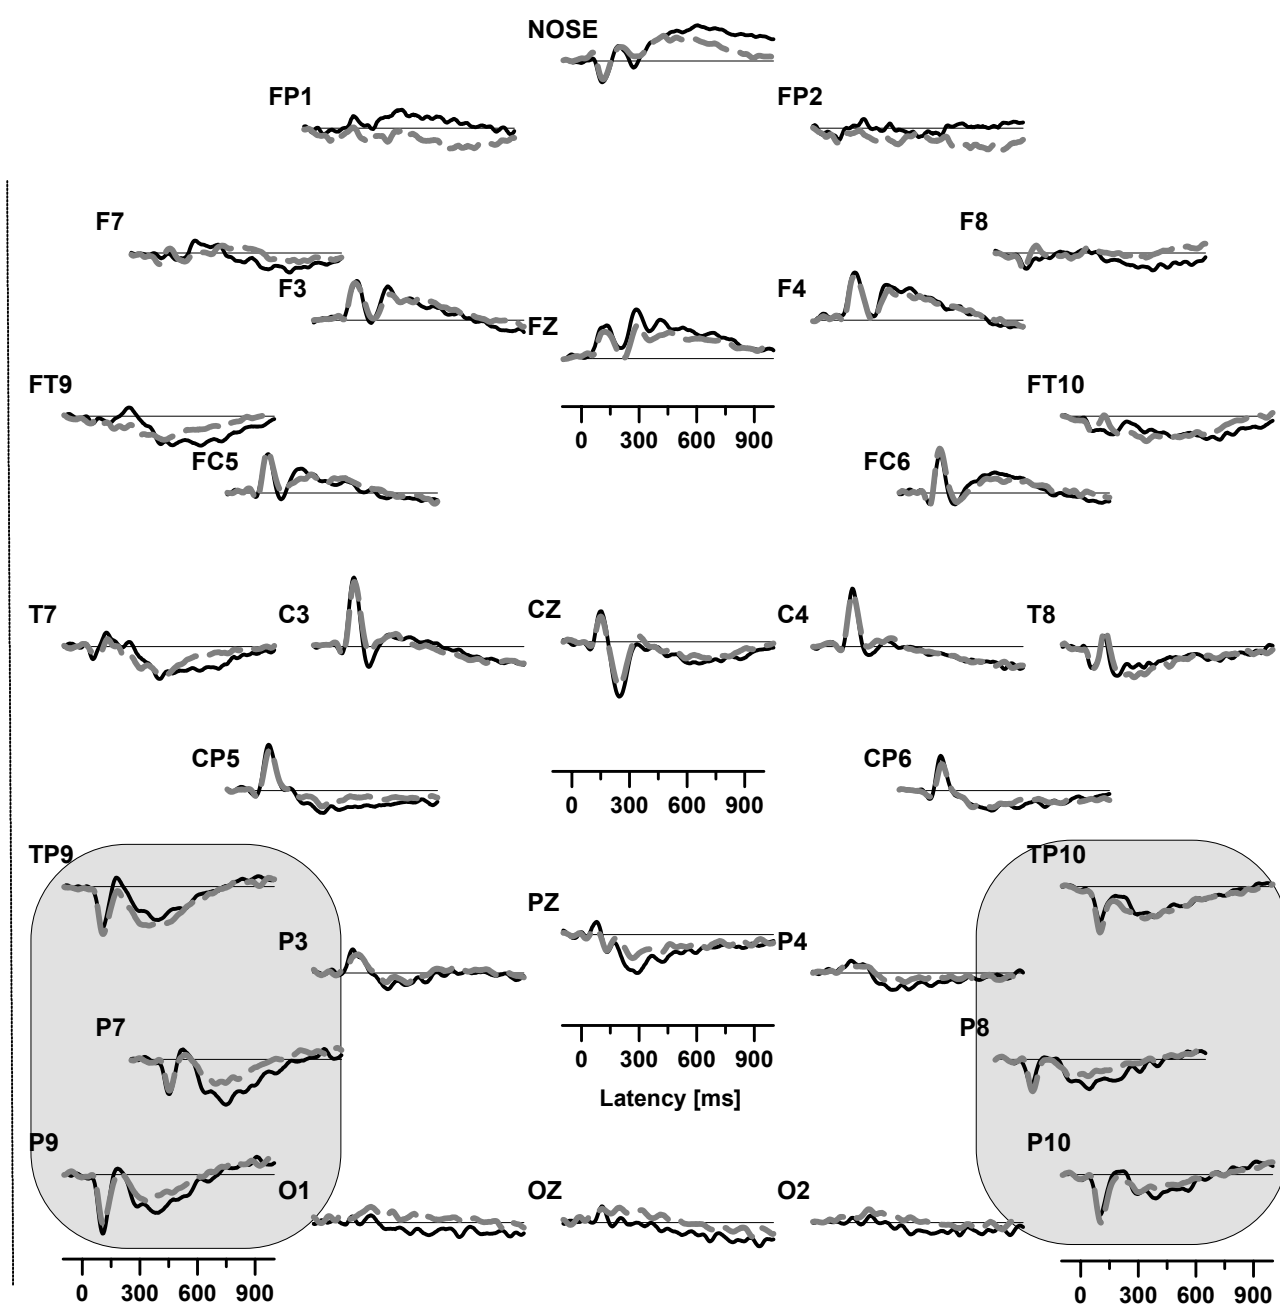

Supplement: NIHMS38573-supplement-04.pdf [file NIHMS38573-supplement-04.pdf]
